# Supplementary material for: Butyl-fructooligosaccharides modulate gut microbiota in healthy mice and ameliorate ulcerative colitis in a DSS-induced model
Source: Royal Society of Chemistry journal article supplement (doi:10.1039/d1fo03337a), 2022-01-01
Supplement: d1fo03337a1.pdf [file d1fo03337a1.pdf]

**Supplementary Materials:**

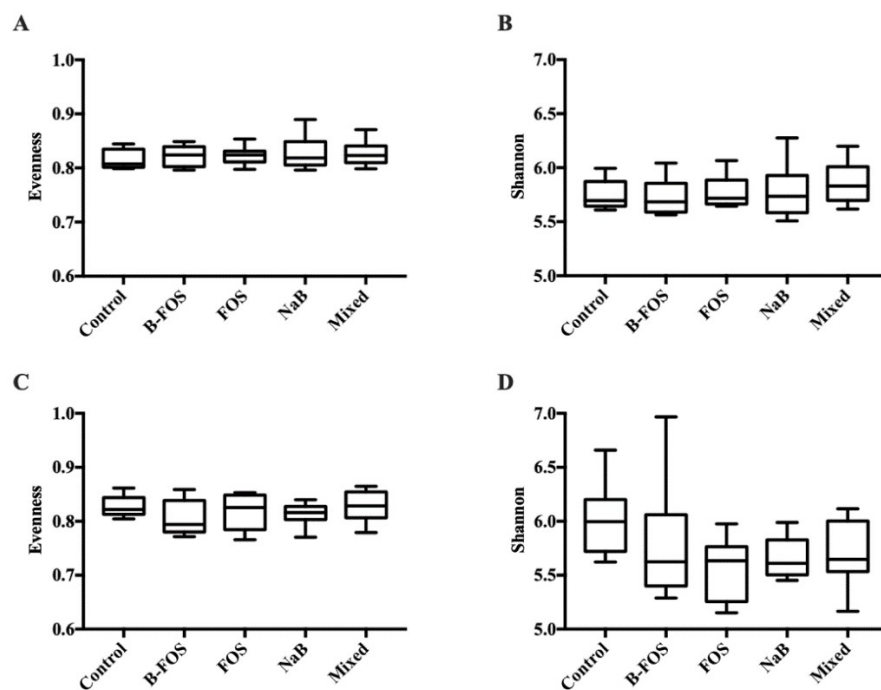

**Figure S1.** Comparison of alpha diversity indices amongst groups before and after 4-week oral administration. Alpha diversities of microbial communities are shown as evenness at 0 week (A) and the fourth week (C) and richness at 0 week (B) and the fourth week (D). Significance was accepted as  $P < 0.05$  ( $n = 8$ ).

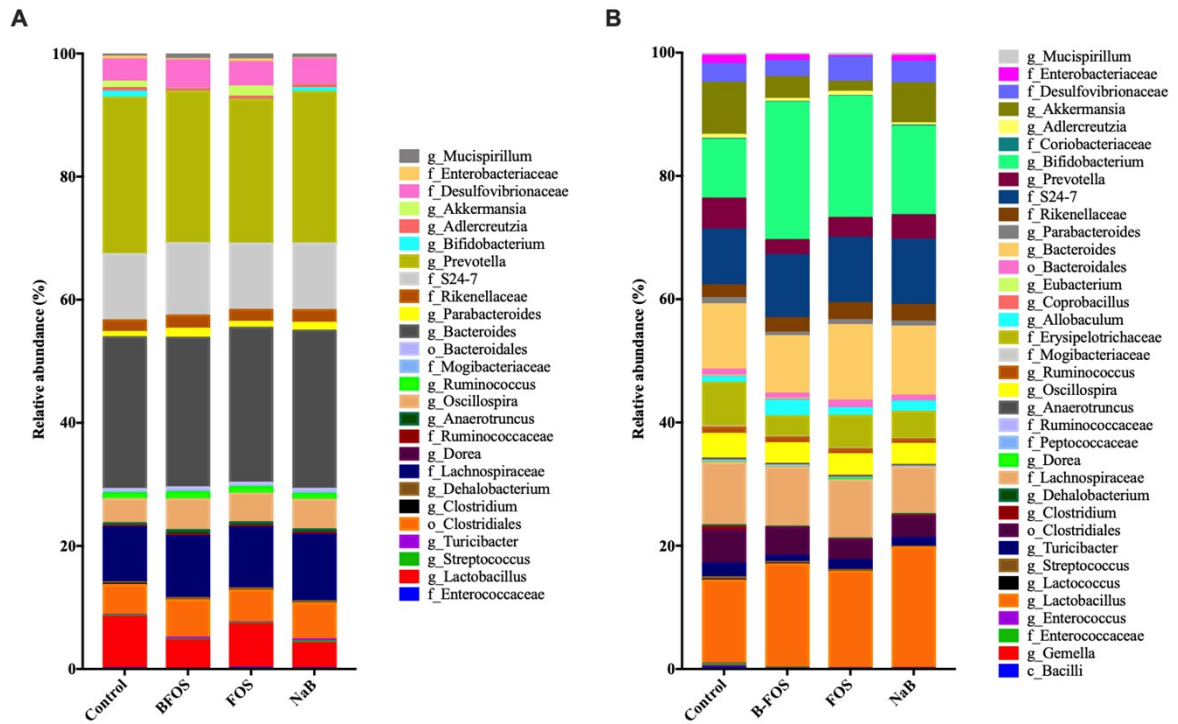

**Figure S2.** Microbiota composition of average relative abundance of each group at genus level before (A) and after 4-week treatments (B). Taxa with relative abundance below 0.1% were excluded prior to analyses. (n = 8).

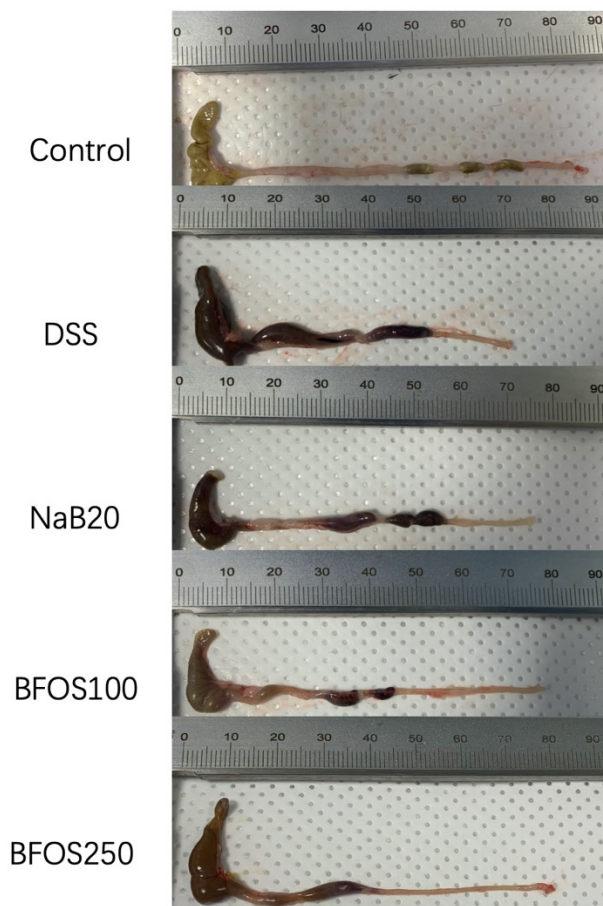

**Figure S3.** Macroscopic appearance of colon in the DSS-induced colitis of mice.
